# Supplementary material
Source: publisher site journal article supplement (https://www.dovepress.com/article/482589)
Supplement: Supplementary file 1 [file get_supplementary_file.php]

Table S1 Correlation analysis of explanatory variables

| Variables | Gender | Age | Education | Marital status | Residence | Drinking | Smoking | Self-rated health | Chronic disease status | Sleep time | Body pain |
| --- | --- | --- | --- | --- | --- | --- | --- | --- | --- | --- | --- |
| Gender | 1 |  |  |  |  |  |  |  |  |  |  |
| Age | -0.0300 | 1 |  |  |  |  |  |  |  |  |  |
| Education | -0.1890 | -0.1987 | 1 |  |  |  |  |  |  |  |  |
| Marital status | -0.0974 | -0.3082 | 0.1049 | 1 |  |  |  |  |  |  |  |
| Residence | -0.0350 | -0.0124 | 0.3332 | -0.0077 | 1 |  |  |  |  |  |  |
| Drinking | -0.3437 | -0.0695 | 0.1604 | 0.0416 | 0.0778 | 1 |  |  |  |  |  |
| Smoking | -0.3319 | 0.0081 | 0.0702 | 0.0174 | 0.0486 | 0.1519 | 1 |  |  |  |  |
| Self-rated health | 0.1123 | 0.1520 | -0.1311 | -0.0541 | -0.0777 | -0.1193 | -0.0299 | 1 |  |  |  |
| Chronic disease status | 0.0473 | 0.2527 | -0.0664 | -0.0979 | 0.0014 | -0.0548 | 0.0010 | 0.4215 | 1 |  |  |
| Sleep time | -0.0945 | -0.1062 | 0.0552 | 0.0725 | -0.0241 | 0.0294 | 0.0114 | -0.2430 | -0.1649 | 1 |  |
| Body pain | 0.1603 | 0.0863 | -0.0784 | -0.0433 | -0.0216 | -0.0581 | -0.0329 | 0.4057 | 0.3417 | -0.2101 | 1 |

Table S2 Variance inflation factor test for explanatory variables

| Variables | Gender | Age | Education | Marital status | Residence | Drinking | Smoking | Self-rated health | Chronic disease status | Sleep time | Body pain |
| --- | --- | --- | --- | --- | --- | --- | --- | --- | --- | --- | --- |
| VIF | 1.34 | 1.24 | 1.25 | 1.15 | 1.14 | 1.16 | 1.13 | 1.40 | 1.33 | 1.09 | 1.29 |
| 1/VIF | 0.75 | 0.80 | 0.80 | 0.87 | 0.87 | 0.86 | 0.89 | 0.71 | 0.75 | 0.92 | 0.78 |

| Table S3 Multiple model binary logistic regression analysis | | | | |
| --- | --- | --- | --- | --- |
| Variable | Model 1 | | Model 2 | |
| OR(95% CI) | *P* value | OR(95% CI) | *P* value |
| Sleep time | 0.82(0.78-0.88) | *p*<0.001 | 0.85(0.80-0.91) | *p*<0.001 |
| Body pain |  |  |  |  |
| No | 1 |  | 1 |  |
| Yes | 2.24(1.83-2.75) | *p*<0.001 | 1.84(1.49-2.30) | *p*<0.001 |
| Gender |  |  |  |  |
| Male |  |  | 1 |  |
| Female |  |  | 1.39(1.01-1.92) | 0.042 |
| Age |  |  | 1.01(1.00-1.03) | 0.031 |
| Residence |  |  |  |  |
| Rural |  |  | 1 |  |
| Town |  |  | 0.74(0.53-1.01) | 0.065 |
| City |  |  | 0.55(0.42-0.73) | *p*<0.001 |
| Education |  |  |  |  |
| Primary and below |  |  | 1 |  |
| Secondary school |  |  | 0.64(0.49-0.82) | *p*<0.001 |
| Junior college or above |  |  | 0.59(0.23-1.50) | 0.264 |
| Marital status |  |  |  |  |
| Nonexistent marriage |  |  | 1 |  |
| marriage |  |  | 0.63(0.45-0.88) | 0.008 |
| Drinking |  |  |  |  |
| No |  |  | 1 |  |
| Yes |  |  | 0.80(0.62-1.05) | 0.106 |
| Smoking |  |  |  |  |
| No |  |  | 1 |  |
| Yes |  |  | 0.85(0.46-1.57) | 0.607 |
| Self-rated health |  |  |  |  |
| good |  |  | 1 |  |
| common |  |  | 2.09(1.67-2.62) | *p*<0.001 |
| poor |  |  | 3.46(2.26-5.27) | *p*<0.001 |

Note: model1 and model2 are robustness test results after removing patients with chronic diseases
